# Supplementary material
Source: Elsevier journal article supplement (https://www.sciencedirect.com/science/article/pii/S1885585719304074)
Supplement: mmc1 [file S1885585719304074:mmc1.pdf]

## Cirugía de revascularización coronaria en España. Influencia del volumen de procedimientos en los resultados. Material adicional

### 1. Fuente de datos

El CMBD de 2013-2015 cedido a la Sociedad Española de Cardiología por el Ministerio de Sanidad contiene 1.076.592 episodios de hospitalización registrados en hospitales del Sistema Nacional de Salud con diagnóstico principal de «enfermedades cardiacas» o sin ese diagnóstico y alta dada por un servicio de cardiología o cirugía cardíaca. El CMBD incluye información sobre las características demográficas de los pacientes atendidos, variables referidas al proceso de atención y de tipo clínico, relacionadas con las enfermedades y condiciones del paciente y los procedimientos realizados durante su atención, codificados mediante la Clasificación Internacional de Enfermedades, Novena Revisión, Modificación Clínica<sup>1</sup>.

### 2. Enfermedades cardiacas

Códigos CIE-9-MC: 390.\*-398.\* (cardiopatía reumática); 401.\*-405.\* (cardiopatía hipertensiva); 410.\*-414.\* (cardiopatía isquémica); 415.\*-417.\* (enfermedades de la circulación pulmonar); 420.\*-429.\* (otras formas de cardiopatía -incluye la insuficiencia cardíaca: 428.\*-); y 441.01, 441.1, 441.2, 444.1 (aneurisma y disección aórtica).

**Tabla 1. Causas más frecuentes de los reingresos por enfermedades del corazón a los 30 días tras BPAoC**

| Reingresos 30 d BPAoC |                                                                                              |     |      |
|-----------------------|----------------------------------------------------------------------------------------------|-----|------|
| Código CIE-9-MC       | Descripción                                                                                  | N   | %    |
| 428                   | Insuficiencia cardíaca                                                                       | 566 | 43,2 |
| 427                   | Arritmia                                                                                     | 133 | 10,2 |
| 414                   | Otras formas de cardiopatía isquémica crónica                                                | 172 | 13,1 |
| 429                   | Complicaciones cardiacas mal definidas (incluye trastornos funcionales por cirugía cardíaca) | 100 | 7,6  |
| 415                   | Enfermedad cardíaca pulmonar aguda                                                           | 33  | 2,5  |
| 410                   | Infarto agudo de miocardio                                                                   | 122 | 9,3  |
| 411                   | Otras formas agudas y subagudas de cardiopatía isquémica                                     | 50  | 3,8  |
| 423                   | Otras enfermedades del pericardio                                                            | 33  | 2,5  |
| 426                   | Trastornos de la conducción                                                                  | 22  | 1,7  |
| 402                   | Cardiopatía hipertensiva                                                                     | 17  | 1,3  |

### 3. Ajustes de la mortalidad y reingresos en revascularización

**Tabla 2. Factores de riesgo que intervienen en el ajuste de la mortalidad intrahospitalaria en CABG**

| Variable                                                       | odds ratio | p       | [intervalo de confianza del 95%] |       |
|----------------------------------------------------------------|------------|---------|----------------------------------|-------|
| Edad                                                           | 1,04       | < 0,001 | 1,03                             | 1,06  |
| Mujer                                                          | 1,81       | < 0,001 | 1,53                             | 2,16  |
| Shock cardiogénico                                             | 15,05      | < 0,001 | 11,35                            | 19,97 |
| Obesidad/Alteraciones del tiroides, colesterol, lípidos        | 0,48       | < 0,001 | 0,41                             | 0,57  |
| Enfermedad hepática y biliar                                   | 4,65       | < 0,001 | 3,47                             | 6,23  |
| Demencia u otras enfermedades cerebrales                       | 3,23       | < 0,001 | 2,13                             | 4,90  |
| Insuficiencia cardiaca                                         | 1,96       | < 0,001 | 1,65                             | 2,33  |
| IAM)                                                           | 2,56       | < 0,001 | 1,94                             | 3,39  |
| Angina/IAM antiguo                                             | 0,65       | 0,003   | 0,49                             | 0,86  |
| Hipertensión                                                   | 0,70       | < 0,001 | 0,58                             | 0,83  |
| Ictus                                                          | 6,98       | < 0,001 | 4,44                             | 10,96 |
| Enfermedad vascular y complicaciones o enfermedad circulatoria | 1,98       | < 0,001 | 1,65                             | 2,38  |
| Neumonía                                                       | 1,30       | 0,026   | 1,03                             | 1,63  |
| Insuficiencia renal                                            | 3,35       | < 0,001 | 2,81                             | 3,98  |

**CABG: cirugía de revascularización aortocoronaria, IAM: infarto agudo de miocardio.**

**Figura 1. Curva ROC Ajuste de la mortalidad intrahospitalaria por CABG**

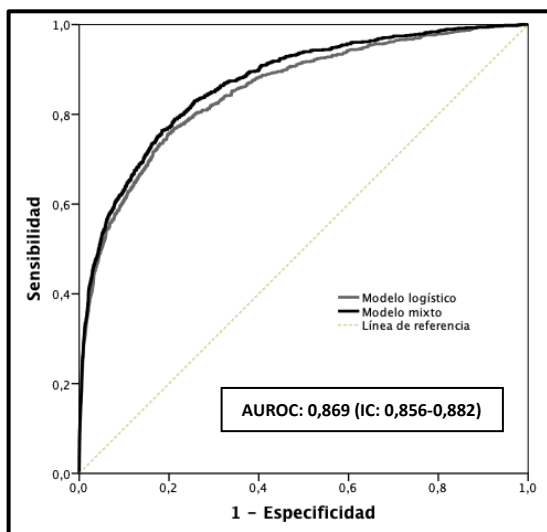

**Tabla 3. Factores de riesgo que intervienen en el ajuste de la mortalidad a los 30 días en CABG**

| Variable                                                        | odds ratio | p      | [intervalo de confianza del 95%] |       |
|-----------------------------------------------------------------|------------|--------|----------------------------------|-------|
| Edad                                                            | 1,05       | <0,001 | 1,04                             | 1,06  |
| Mujer                                                           | 1,82       | <0,001 | 1,53                             | 2,16  |
| Shock cardiogénico (ICD-9 -MC: 785.51)                          | 15,03      | <0,001 | 11,32                            | 19,96 |
| Obesidad/Alteraciones del tiroides, Colesterol, lípidos (CC_24) | 0,48       | <0,001 | 0,40                             | 0,56  |
| Enfermedad hepática y biliar (CC 25_30)                         | 4,65       | <0,001 | 3,47                             | 6,24  |
| Demencia u otras enfermedades cerebrales (CC 49_50)             | 3,21       | <0,001 | 2,11                             | 4,88  |
| Insuficiencia cardiaca (CC_80)                                  | 1,97       | <0,001 | 1,66                             | 2,35  |
| Infarto agudo de miocardio (IAM) (CC 81)                        | 1,95       | <0,001 | 1,64                             | 2,32  |
| Angina/IAM antiguo (CC83)                                       | 2,58       | <0,001 | 1,95                             | 3,42  |
| Hipertensión (CC 91)                                            | 0,66       | <0,001 | 0,50                             | 0,88  |

| Variable                                                                    | odds ratio | p      | [intervalo de confianza del 95%] |       |
|-----------------------------------------------------------------------------|------------|--------|----------------------------------|-------|
| Ictus (CC 95_96)                                                            | 0,68       | <0,001 | 0,57                             | 0,82  |
| Enfermedad vascular y complicaciones o enfermedad circulatoria (CC 104_106) | 6,91       | <0,001 | 4,40                             | 10,86 |
| Neumonía (CC 111_113)                                                       | 2,00       | <0,001 | 1,67                             | 2,40  |
| Insuficiencia renal (CC 131)                                                | 1,30       | 0,023  | 1,04                             | 1,64  |
| Úlcera de decúbito o úlcera crónica en la piel (CC 148_149)                 | 3,35       | <0,001 | 2,82                             | 3,98  |

CABG: cirugía de revascularización aortocoronaria, CC: *Condition Categories*<sup>[Error! Marcador no definido.]</sup> IAM: infarto agudo de miocardio

Figura 2. Curva ROC Ajuste de la mortalidad a los 30 días en la CABG

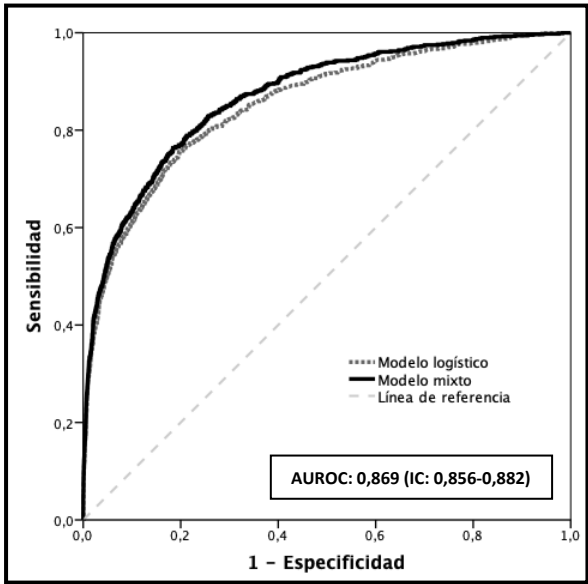

Tabla 4. Factores de riesgo que intervienen en el ajuste de los reingresos a los 30 días en la CABG

| Variable                                                    | odds ratio | p     | [intervalo de confianza del 95%] |      |
|-------------------------------------------------------------|------------|-------|----------------------------------|------|
| Arritmias cardíacas (CC 92-93)                              | 1,17       | 0,009 | 1,04                             | 1,32 |
| Úlcera de decúbito o úlcera crónica en la piel (CC 148_149) | 1,86       | 0,03  | 1,06                             | 3,24 |

CC: *“Condition Categories”*<sup>[Error! Marcador no definido.]</sup>

Figura 3. Curva ROC Ajuste de los reingresos a 30 días en la CABG

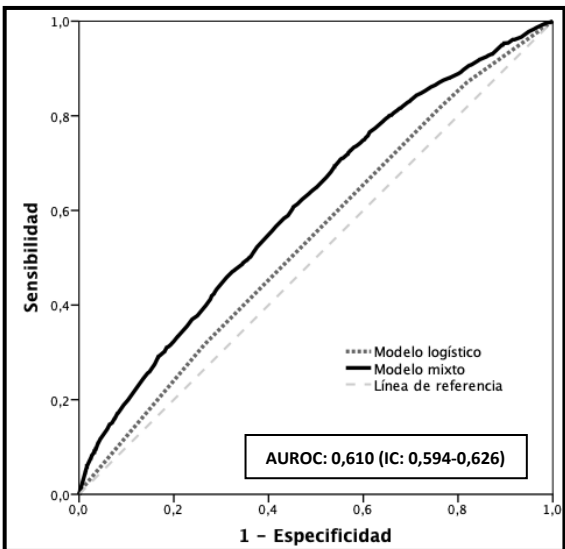

**Tabla 5. Discriminación de los ajustes para CABG y CABG aislada**

| Procedimiento       | Indicador                                                     | AROC (MN) | IC          |
|---------------------|---------------------------------------------------------------|-----------|-------------|
| <b>CABG total</b>   | Mortalidad intrahospitalaria                                  | 0,869     | 0,856-0,882 |
|                     | Mortalidad cardiaca ajustada a riesgo a los 30 días           | 0,869     | 0,856-0,882 |
|                     | Reingresos por causa cardiaca justados a riesgo a los 30 días | 0,611     | 0,595-0,627 |
|                     | Mortalidad intrahospitalaria                                  | 0,873     | 0,855_0,892 |
| <b>CABG aislado</b> | Mortalidad cardiaca ajustada a riesgo a los 30 días           | 0,877     | 0,856-0,898 |
|                     | Reingresos por causa cardiaca justados a riesgo a los 30 días | 0,639     | 0,620-0,658 |

**AROC (MN):** Área bajo las curvas *receiver operating characteristic (modelo multinivel)*, CABG: cirugía de revascularización aortocoronaria

**Tabla 6. Contrastes de los factores de riesgo. Hospitales de «alto» ( $\geq 155$  CABG/año) y «bajo» ( $< 155$  CABG /año) volumen. Ingresos programados para el BPAoC aislado**

|                                                                        | $< 155$<br>CABG/año | $\geq 155$<br>CABG/año | p       |
|------------------------------------------------------------------------|---------------------|------------------------|---------|
| <b>N</b>                                                               | <b>3.543</b>        | <b>3.518</b>           |         |
| Edad (promedio y DS)                                                   | 65,3 $\pm$ 9,6      | 65,5 $\pm$ 9,5         | 0,156   |
| Mujer (%)                                                              | 16,3                | 16,1                   | 0,797   |
| Shock cardiogénico (%)                                                 | 0,9                 | 0,5                    | ,037*   |
| Obesidad, alteraciones del tiroides, hipercolesterolemia/lipidemia (%) | 68,5                | 69                     | 0,640   |
| Enfermedad hepática y/o biliar (%)                                     | 3,8                 | 2,5                    | 0,002*  |
| Demencia u otras enfermedades cerebrales (%)                           | 1                   | 0,7                    | 0,126   |
| Insuficiencia cardiaca (%)                                             | 13,2                | 10,5                   | <0,001* |
| Infarto agudo de miocardio (IAM) (%)                                   | 2,9                 | 1,8                    | <0,002* |
| Angina/IAM antiguo (%)                                                 | 21,6                | 19,5                   | 0,03*   |
| Hipertensión (%)                                                       | 61,6                | 62,7                   | 0,357   |
| Ictus                                                                  | 0,7                 | 0,3                    | <0,017  |
| Enfermedad vascular y complicaciones o enfermedad circulatoria (%)     | 15,6                | 13,8                   | <0,033* |
| Neumonía (%)                                                           | 7,5                 | 5,1                    | <0,001* |
| Insuficiencia renal (%)                                                | 12,9                | 12,9                   | 0,95    |
| Úlcera de decúbito o úlcera crónica en la piel (%)                     | 0,5                 | 0,4                    | 0,476   |

Nota: las comorbilidades se han agrupado de acuerdo con las *Condition Categories* de Pope et al.<sup>2</sup>; \* El estadístico de  $\chi^2$  es significativo en el nivel ,05.

CABG: cirugía de revascularización aortocoronaria.

## Referencias

1 Registro de altas de hospitalización: CMBD del Sistema Nacional de Salud. Glosario de términos y definiciones. Portal estadístico SNS [actualizado Sep 2016]. p. 5-6. Disponible en:

<http://pestadistico.inteligenciadegestion.msssi.es/publicoSNS/comun/DescargaDocumento.aspx?IdNodo=6415>. Consultado 16 Ene 2018.

2. Pope GC, Ellis RP, Ash AS et al. Principal inpatient diagnostic cost group model for Medicare risk adjustment. *Health Care Financ Rev* 2000; 21:93-118.
